# Supplementary material for: Hydrogen bonding interactions between arsenious acid and dithiothreitol/dithioerythritol at different pH values: a computational study with an explicit solvent model
Source: Royal Society of Chemistry journal article supplement (doi:10.1039/d1nj03191k), 2021-01-01
Supplement: d1nj03191k1.pdf [file d1nj03191k1.pdf]

**Hydrogen bonding interactions between arsenious acid and  
dithiothreitol/dithioerythritol at different pH values: A  
computational study under explicit solvent model**

*Jinyu Shen<sup>a</sup>, Xiuxiu Wu<sup>a</sup>, Jinsong Yu<sup>a</sup>, Fengqin Yin<sup>a</sup>, Liling Hao<sup>a</sup>, Caixia Lin<sup>a</sup>, Lizhi Zhu<sup>a</sup>, Chunyan*

*Luo<sup>a</sup>, Changzhe Zhang<sup>b</sup>, Fei Xu<sup>\*a</sup>*

*<sup>a</sup>School of Medical Instrument and Food Engineering, Shanghai Engineering Research Center for  
Food Rapid Detection, University of Shanghai for Science and Technology, Shanghai, 200093, China.*

*<sup>b</sup>School of Physics and Electronics, Shandong Normal University, Jinan, 250358, China.*

**Supplementary material**

**Table S1** The forms of arsenious acid, DTT/DTE and solvent molecules at different pH values.

| pH range | $H_{n+3}AsO_3^n$ | DTT <sup>m</sup> | DTE <sup>m</sup> | HEPES <sup>k</sup> |
|----------|------------------|------------------|------------------|--------------------|
| 1.00     | 0                | 0                | 0                | /                  |
|          |                  |                  |                  |                    |
| 6.80     |                  |                  |                  |                    |
|          |                  |                  |                  |                    |
| 7.00     |                  |                  |                  |                    |
|          |                  |                  |                  |                    |
| 7.50     |                  |                  |                  |                    |
|          |                  |                  |                  |                    |
| 8.30     | -1               | -1               | -1               | -1                 |
|          |                  |                  |                  |                    |
| 9.23     |                  |                  |                  |                    |
|          |                  |                  |                  |                    |
| 9.50     |                  |                  |                  |                    |
|          |                  |                  |                  |                    |
| 12.10    |                  |                  |                  |                    |
|          |                  |                  |                  |                    |
| 13.41    | -2               | -2               | -2               | /                  |
|          |                  |                  |                  |                    |
| 14.00    | -3               |                  |                  |                    |

Note: n, m and k in the table represent the valence states respectively

**Table S2** The binding energy  $\Delta E$  of the most stable optimized configurations in aqueous solution and HEPES buffer under DFT/B3LYP-D3 method.

| Conformation                                                       | $\Delta E$ (kcal/mol) |
|--------------------------------------------------------------------|-----------------------|
| H <sub>3</sub> AsO <sub>3</sub> -DTT-HEPES                         | -27.57                |
| H <sub>3</sub> AsO <sub>3</sub> -DTE-HEPES                         | -32.47                |
| H <sub>3</sub> AsO <sub>3</sub> -DTT-HEPES <sup>-</sup>            | -54.53                |
| H <sub>3</sub> AsO <sub>3</sub> -DTE-HEPES <sup>-</sup>            | -61.51                |
| H <sub>3</sub> AsO <sub>3</sub> -DTT-H <sub>2</sub> O              | -26.64                |
| H <sub>3</sub> AsO <sub>3</sub> -DTE-H <sub>2</sub> O              | -25.14                |
| H <sub>3</sub> AsO <sub>3</sub> -DTT-H <sub>2</sub> O <sup>-</sup> | -44.97                |
| H <sub>3</sub> AsO <sub>3</sub> -DTE-H <sub>2</sub> O <sup>-</sup> | -48.83                |
| H <sub>2</sub> AsO <sub>3</sub> <sup>-</sup> -DTT-H <sub>2</sub> O | 4.58                  |
| H <sub>2</sub> AsO <sub>3</sub> <sup>-</sup> -DTE-H <sub>2</sub> O | -8.49                 |

**Table S3** QTAIM topology analysis parameters of the most stable configurations under explicit solvent model

calculated by DFT/B3LYP method. (The unit is a.u.)

| Configurations                                          | Hydrogen bonds | $\rho$ (r) | $\nabla^2\rho$ (r) | $H_{BCP}/10^{-4}$ | $LBO/10^{-4}$ |
|---------------------------------------------------------|----------------|------------|--------------------|-------------------|---------------|
| H <sub>3</sub> AsO <sub>3</sub> -DTT-H <sub>2</sub> O   | O25···H7-O6    | 0.0498     | 0.1387             | -18.30            | 3.36          |
| H <sub>3</sub> AsO <sub>3</sub> -DTT-H <sub>2</sub> O   | S18···H27-O25  | 0.0414     | 0.0469             | -68.40            | 5.47          |
| H <sub>3</sub> AsO <sub>3</sub> -DTT-H <sub>2</sub> O   | O6···H24-O23   | 0.0307     | 0.0904             | -5.76             | 0.75          |
| H <sub>3</sub> AsO <sub>3</sub> -DTT-H <sub>2</sub> O   | O21···H3-O2    | 0.0397     | 0.1185             | 1.99              | 1.79          |
| H <sub>3</sub> AsO <sub>3</sub> -DTT-H <sub>2</sub> O   | O23···H5-O4    | 0.0302     | 0.0909             | -0.61             | 0.97          |
| H <sub>3</sub> AsO <sub>3</sub> -DTT-H <sub>2</sub> O   | O2···H29-O28   | 0.0153     | 0.0449             | -1.44             | 0.34          |
| H <sub>3</sub> AsO <sub>3</sub> -DTT-H <sub>2</sub> O   | O4···H30-O28   | 0.0237     | 0.0661             | -8.75             | 1.13          |
| H <sub>3</sub> AsO <sub>3</sub> -DTT-H <sub>2</sub> O   | O28···H20-S19  | 0.0160     | 0.0387             | -5.21             | 0.61          |
| H <sub>3</sub> AsO <sub>3</sub> -DTE-H <sub>2</sub> O   | O25···H22-O21  | 0.0405     | 0.1112             | -8.90             | 1.95          |
| H <sub>3</sub> AsO <sub>3</sub> -DTE-H <sub>2</sub> O   | S13···H26-O25  | 0.0300     | 0.0483             | -30.50            | 1.82          |
| H <sub>3</sub> AsO <sub>3</sub> -DTE-H <sub>2</sub> O   | S13···H20-O19  | 0.0330     | 0.0442             | -39.90            | 1.53          |
| H <sub>3</sub> AsO <sub>3</sub> -DTE-H <sub>2</sub> O   | O23···H15-O24  | 0.0270     | 0.0753             | -8.40             | 0.58          |
| H <sub>3</sub> AsO <sub>3</sub> -DTE-H <sub>2</sub> O   | O28···H24-O23  | 0.0258     | 0.0707             | -7.79             | 0.49          |
| H <sub>3</sub> AsO <sub>3</sub> -DTE-H <sub>2</sub> O   | S11···H30-O28  | 0.0082     | 0.0267             | 13.20             | 0.05          |
| H <sub>3</sub> AsO <sub>3</sub> -DTE-H <sub>2</sub> O   | O14···H29-O28  | 0.0326     | 0.0938             | -5.69             | 0.21          |
| H <sub>3</sub> AsO <sub>3</sub> -DTT-HEPES <sup>-</sup> | S20···H57-O56  | 0.0138     | 0.0338             | 5.22              | 0.24          |
| H <sub>3</sub> AsO <sub>3</sub> -DTT-HEPES <sup>-</sup> | O54···H19-S18  | 0.0098     | 0.0266             | 2.64              | 0.09          |
| H <sub>3</sub> AsO <sub>3</sub> -DTT-HEPES <sup>-</sup> | S18···H7-O6    | 0.0277     | 0.0782             | -8.01             | 0.08          |
| H <sub>3</sub> AsO <sub>3</sub> -DTT-HEPES <sup>-</sup> | O22···H3-O2    | 0.0413     | 0.1230             | -4.60             | 2.01          |
| H <sub>3</sub> AsO <sub>3</sub> -DTT-HEPES <sup>-</sup> | O53···H23-O22  | 0.0607     | 0.1623             | -59.40            | 8.19          |
| H <sub>3</sub> AsO <sub>3</sub> -DTE-HEPES <sup>-</sup> | O20···H12-S11  | 0.0146     | 0.0410             | 0.75              | 0.51          |
| H <sub>3</sub> AsO <sub>3</sub> -DTE-HEPES <sup>-</sup> | O54···H21-O20  | 0.0304     | 0.0916             | -1.20             | 0.95          |
| H <sub>3</sub> AsO <sub>3</sub> -DTE-HEPES <sup>-</sup> | O53···H23-O22  | 0.0540     | 0.1574             | -27.00            | 4.89          |
| H <sub>3</sub> AsO <sub>3</sub> -DTE-HEPES <sup>-</sup> | O22···H16-O15  | 0.0387     | 0.1155             | -1.86             | 2.07          |
| H <sub>3</sub> AsO <sub>3</sub> -DTE-HEPES <sup>-</sup> | O56···H14-S13  | 0.0076     | 0.0248             | 7.95              | 0.06          |
| H <sub>3</sub> AsO <sub>3</sub> -DTE-HEPES <sup>-</sup> | O15···H57-O56  | 0.0273     | 0.0762             | -5.30             | 0.73          |

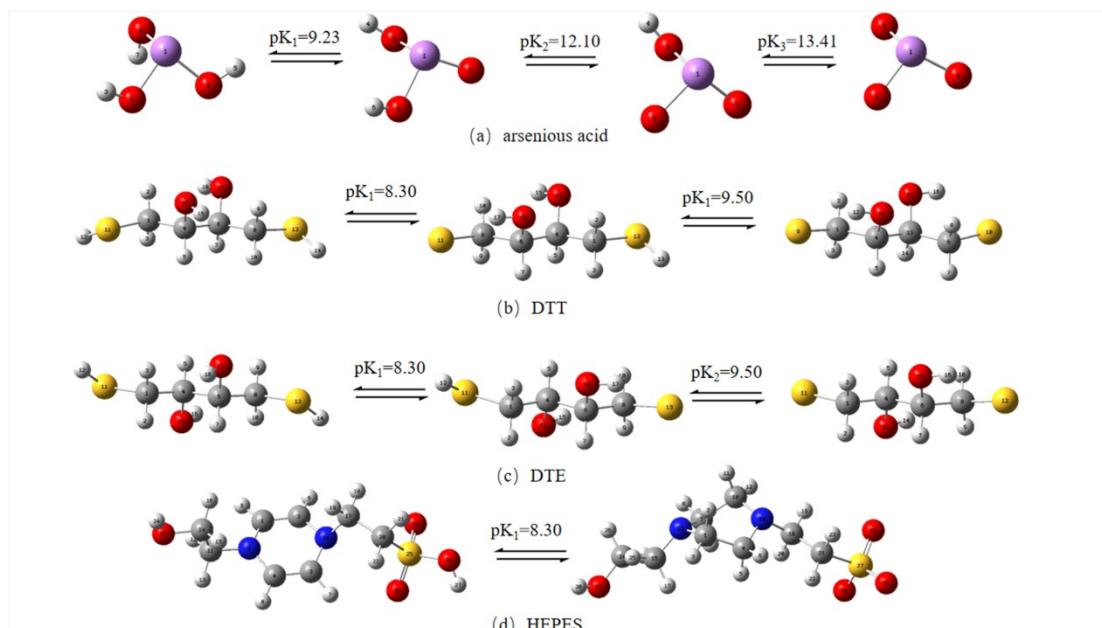

Fig. S1 Dissociated structures of arsenious acid, DTT/DTE and HEPES.
